# Supplementary material
Source: PubMed Central journal article supplement (PMC3110814)

# Correlations between callosal thickness and intelligence

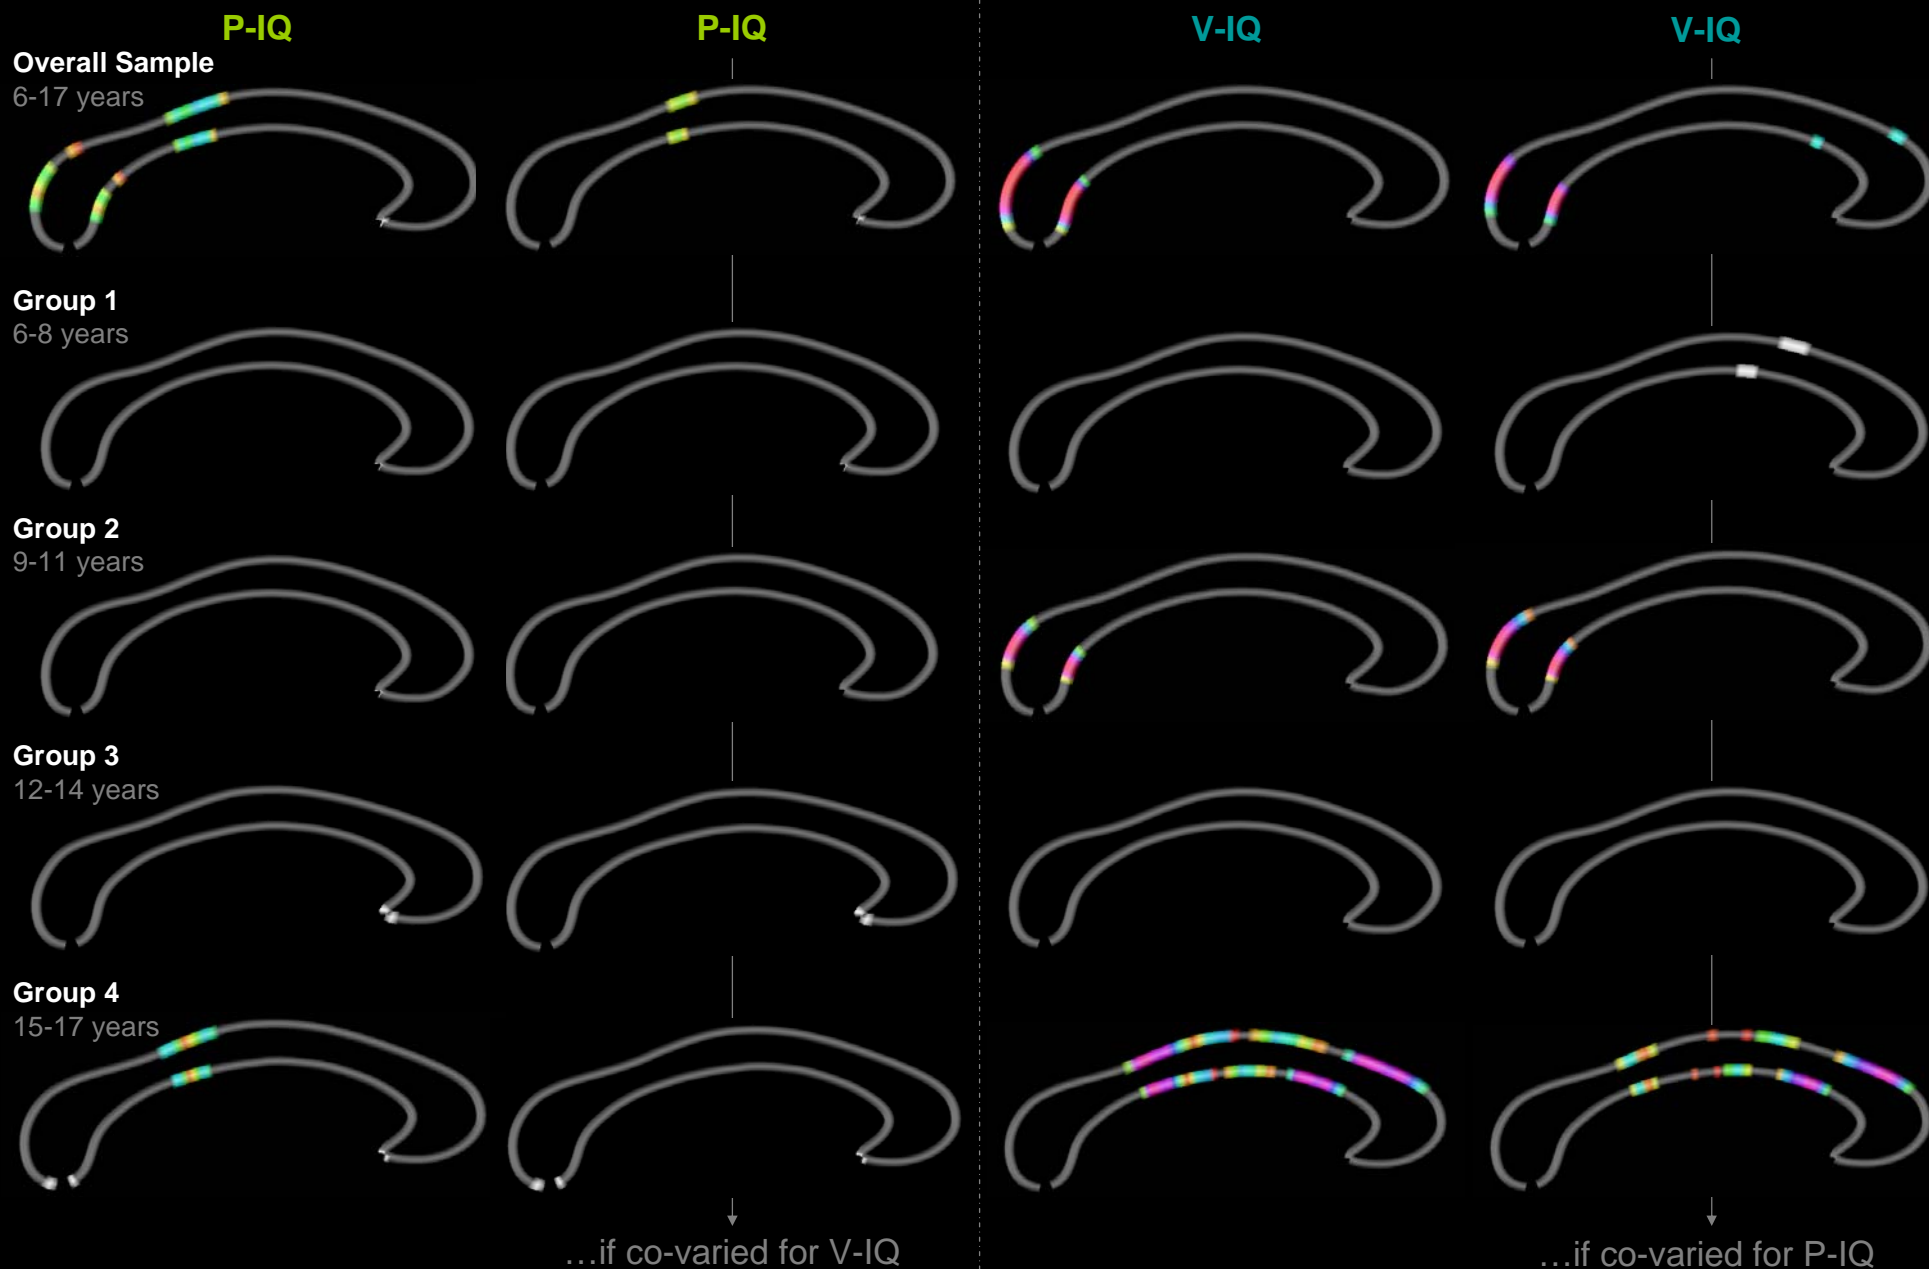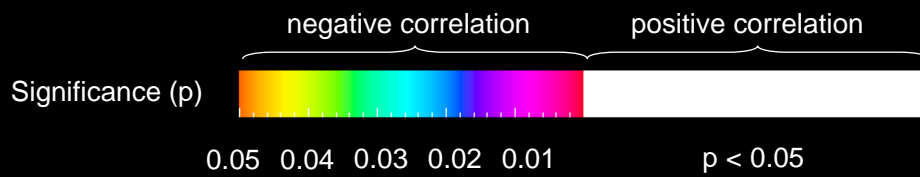

Supplement: NIHMS249840-supplement-01.pdf [file NIHMS249840-supplement-01.pdf]
